# Supplementary material
Source: PubMed Central journal article supplement (PMC5961741)
Supplement: NIHMS965320-supplement-Supp_info.pdf [file NIHMS965320-supplement-Supp_info.pdf]

**Supplementary Table 1: Cardiomyopathy-associated genes eligible for study**

| Gene                                                                     | Cardiomyopathy <sup>a</sup>                                     | Other Conditions <sup>a</sup>                                                 | Gene                                                                     | Cardiomyopathy <sup>a</sup>                                       | Other Conditions <sup>a</sup>                                                   |
|--------------------------------------------------------------------------|-----------------------------------------------------------------|-------------------------------------------------------------------------------|--------------------------------------------------------------------------|-------------------------------------------------------------------|---------------------------------------------------------------------------------|
| <b><i>MYPN</i></b><br>(myopalladin)                                      | DCM=12; HCM=1;<br>RCM=1                                         |                                                                               | <b><i>TPM1</i></b><br>(tropomyosin 1<br>alpha)                           | HCM=22;<br>DCM=19;<br>LNVC=5, RCM=1                               |                                                                                 |
| <b><i>PKP2</i></b><br>(plakophilin 2)                                    | ARVC=193; SCD=5;<br>DCM=1                                       | Brugada syndrome=4                                                            | <b><i>TMEM43</i></b><br>(transmembrane<br>protein 43)                    | ARVC=10;                                                          | Emery-Dreifuss<br>muscular<br>dystrophy-related<br>myopathy=2                   |
| <b><i>DSC2</i></b><br>(desmocollin)                                      | ARVC=51; DCM=1;<br>SCD=1                                        |                                                                               | <b><i>ACTN2</i></b> (Actinin,<br>alpha2)                                 | DCM=6; HCM=5                                                      |                                                                                 |
| <b><i>JUP</i></b> (junction<br>plakoglobin)                              | ARVC=18;                                                        | Cutaneous disease=2;<br>Naxos disease=2;<br>Epidermolysis bullosa=1           | <b><i>MYL2</i></b> (myosin,<br>light chain 2)                            | HCM=26; RCM=1                                                     | Muscle fibre<br>disease, infantile,<br>type1=2                                  |
| <b><i>DSP</i></b><br>(desmoplakin)                                       | ARVC=103;<br>DCM=19;                                            | Skin fragility and wooly<br>hair=6; Epidermolysis<br>bullosa=4                | <b><i>VCL</i></b> (vinculin)                                             | DCM=11;<br>HCM=2; SCD=1                                           |                                                                                 |
| <b><i>DSG2</i></b><br>(desmoglein 2)                                     | ARVC=89; DCM=2                                                  |                                                                               | <b><i>MYH6</i></b> (myosin,<br>heavy chain<br>polypeptide 6,<br>cardiac) | DCM=9; HCM=4                                                      | Congenital heart<br>defects=4; ASD=4;<br>Cardiac<br>dysrhythmia=1               |
| <b><i>MYBPC3</i></b><br>(myosin binding<br>protein C,<br>cardiac)        | HCM=514;<br>DCM=55; LVNC=4;<br>Increased LV wall<br>thickness=2 |                                                                               | <b><i>BAG3</i></b> (BCL-<br>associated<br>athanogene 3)                  | DCM=24                                                            | Myofibrillar<br>myopathy=4                                                      |
| <b><i>MYH7</i></b> (myosin<br>heavy<br>polypeptide 7,<br>cardiac muscle) | HCM=421;<br>DCM=98; LVNC=23                                     | Myopathy, distal1=17                                                          | <b><i>TCAP</i></b> (titin cap)                                           | HCM=6; DCM=5                                                      | Muscular<br>dystrophy, limb<br>girdle=5; Intestinal<br>pseudo-<br>obstruction=1 |
| <b><i>TTN</i></b> (Titin)                                                | DCM, ARVC                                                       | Centronuclear<br>myopathy, tibial<br>muscular dystrophy                       | <b><i>TNNI3</i></b> (troponin<br>I, cardiac)                             | HCM=53;<br>DCM=10;<br>RCM=10;<br>Increased LV wall<br>thickness=2 |                                                                                 |
| <b><i>ANKRD1</i></b><br>(ankyrin repeat<br>domain1,<br>cardiac)          | DCM=7; HCM=3                                                    | Neurodevelopmental<br>d/o=6; Total anomalous<br>pulmonary venous<br>return =2 | <b><i>TNNT2</i></b> (troponin<br>T2, cardiac)                            | HCM=63;<br>DCM=37; RCM=2;<br>Increased LV wall<br>thickness=1     |                                                                                 |

HCM=hypertrophic cardiomyopathy; DCM=dilated cardiomyopathy; ARVC=arrhythmogenic right ventricular cardiomyopathy; RCM=restrictive cardiomyopathy; SCD=sudden cardiac death

<sup>a</sup> Number of reports/publications in Human Gene Mutation Database (HGMD) associating gene with listed phenotype.

## Supplementary Figure 1: Variant Assessment Process

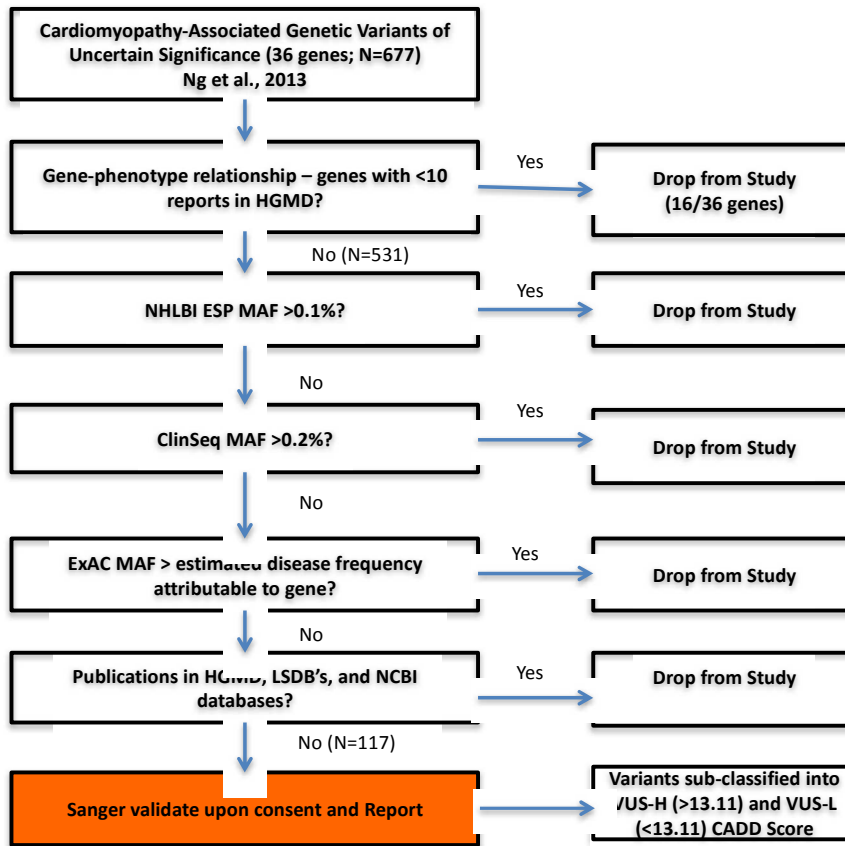

HGMD: Human Gene Mutation Database; MAF: minor allele frequency; NHLBI ESP: National Heart Lung & Blood Institute Exome Sequencing Project; ExAC: Exome Aggregation Consortium; LSDB: Locus Specific Database; NCBI: National Center for Biotechnology Information.

### **S1: VUS sub-classification disclosure to individuals with family history of cardiomyopathy**

Nine individuals, 6 VUS-high and 3 VUS-low, with a family history of cardiomyopathy were included in the study. Four participants intended to share results (2 VUS-high and 2 VUS-low), 3 did not intend to share (3 VUS-high), 1 was unsure (VUS-high), and 1 did not complete the survey (VUS-low). There were no statistically significant differences in intentions between individuals with (mean=4.828, SD=0.582 [95% CI = 4.341 – 5.315]) and without (mean=4.636, SD=0.953 [95% CI = 4.410 – 4.861]) family history of cardiomyopathy ( $t=0.557$ ,  $p=0.579$ ).
